# Supplementary material for: An exceptional functionalization of doped fullerene observed via theoretical studies on the interactions of sulfur-doped fullerenes with halogens and halides
Source: Royal Society of Chemistry journal article supplement (doi:10.1039/c5ra08141f), 2015-01-01
Supplement: c5ra08141f1.pdf [file c5ra08141f1.pdf]

**Supporting information**

**Title:**

**An Exceptional Functionalization of Doped Fullerene Observed via Theoretical Studies on  
the Interactions of Sulfur-Doped Fullerenes with Halogens and Halides**

**Authors:**

Kayvan Saadat, Hossein Tavakol\*

**Address:**

Department of Chemistry, Isfahan University of Technology, Isfahan 84156-83111, Iran; Tell:  
+98-31-33913241; Fax: +98-31-33912350; Email: H\_tavakol@cc.iut.ac.ir.

**Table S1.** Important NBO atomic charges for all complexes

| Complexes               | First S | C (Av) <sup>a</sup> | X(1)   | X(2)   | Second S | C (Av) <sup>a</sup> | X(1)   | X(2)   |
|-------------------------|---------|---------------------|--------|--------|----------|---------------------|--------|--------|
| SF (alone)              | 0.859   | -0.198              | -      | -      | -        | -                   | -      | -      |
| SF-F                    | 0.977   | -0.178              | -0.731 | -      | -        | -                   | -      | -      |
| SF-Cl                   | 0.934   | -0.171              | -0.866 | -      | -        | -                   | -      | -      |
| SF-Br                   | 0.918   | -0.173              | -0.820 | -      | -        | -                   | -      | -      |
| SF-D-F <sub>2</sub>     | 0.871   | -0.197              | -0.026 | -0.010 | -        | -                   | -      | -      |
| SF-D-Cl <sub>2</sub>    | 0.853   | -0.194              | -0.028 | -0.004 | -        | -                   | -      | -      |
| SF-D-Br <sub>2</sub>    | 0.856   | -0.196              | -0.007 | 0.018  | -        | -                   | -      | -      |
| SF-P-F <sub>2</sub>     | 0.860   | -0.197              | -0.003 | 0.006  | -        | -                   | -      | -      |
| SF-P-Cl <sub>2</sub>    | 0.857   | -0.196              | -0.005 | 0.007  | -        | -                   | -      | -      |
| SF-P-Br <sub>2</sub>    | 0.852   | -0.197              | 0.000  | 0.013  | -        | -                   | -      | -      |
| S2F1-2F                 | 0.946   | -0.215              | -0.746 | -      | 0.962    | -0.200              | -0.752 | -      |
| S2F1-2Cl                | 0.920   | -0.213              | -0.872 | -      | 0.931    | -0.187              | -0.901 | -      |
| S2F1-2Br                | 0.898   | -0.221              | -0.851 | -      | 0.921    | -0.197              | -0.870 | -      |
| S2F1-2D-F <sub>2</sub>  | 0.859   | -0.241              | -0.006 | 0.007  | 0.866    | -0.205              | -0.009 | 0.010  |
| S2F1-2D-Cl <sub>2</sub> | 0.901   | -0.227              | -0.036 | -0.454 | 0.924    | -0.174              | -0.033 | -0.004 |
| S2F1-2D-Br <sub>2</sub> | 0.896   | -0.253              | 0.042  | -0.433 | 0.888    | -0.164              | -0.026 | 0.015  |
| S2F1-2P-F <sub>2</sub>  | 0.860   | -0.242              | -0.004 | 0.009  | 0.867    | -0.206              | -0.006 | 0.011  |
| S2F1-2P-Cl <sub>2</sub> | 0.861   | -0.242              | 0.000  | 0.004  | 0.867    | -0.206              | -0.004 | 0.006  |
| S2F1-2P-Br <sub>2</sub> | 0.864   | -0.241              | -0.011 | 0.150  | 0.864    | -0.202              | 0.004  | -0.039 |
| S2F1-DP-F <sub>2</sub>  | 0.813   | -0.042              | -0.301 | -0.597 | 1.040    | -0.134              | -0.018 | -0.124 |
| S2F1-DP-Cl <sub>2</sub> | 0.878   | -0.206              | 0.080  | -0.289 | 0.974    | -0.125              | -0.543 | -0.05  |
| S2F1-DP-Br <sub>2</sub> | 0.880   | -0.244              | 0.199  | -0.332 | 0.945    | -0.132              | -0.462 | -0.027 |
| S2F2-2F                 | 0.970   | -0.208              | -0.712 | -      | 0.950    | -0.189              | -0.760 | -      |
| S2F2-2Cl                | 0.921   | -0.190              | -0.890 | -      | 0.921    | -0.181              | -0.915 | -      |
| S2F2-2Br                | 0.905   | -0.192              | -0.873 | -      | 0.903    | -0.188              | -0.866 | -      |
| S2F2-2D-F <sub>2</sub>  | 0.874   | -0.203              | -0.028 | -0.014 | 0.872    | -0.198              | -0.025 | -0.010 |
| S2F2-2D-Cl <sub>2</sub> | 0.858   | -0.203              | -0.004 | 0.006  | 0.858    | -0.198              | -0.005 | 0.008  |
| S2F2-2D-Br <sub>2</sub> | 0.855   | -0.203              | -0.005 | 0.016  | 0.856    | -0.198              | -0.007 | 0.018  |
| S2F2-2P-F <sub>2</sub>  | 0.889   | -0.183              | -0.176 | -0.278 | 0.866    | -0.197              | -0.006 | 0.011  |
| S2F2-2P-Cl <sub>2</sub> | 0.857   | -0.205              | 0.003  | -0.001 | 0.858    | -0.198              | -0.007 | 0.010  |
| S2F2-2P-Br <sub>2</sub> | 0.851   | -0.205              | 0.014  | 0.005  | 0.855    | -0.198              | -0.007 | 0.018  |
| S2F2-DP-F <sub>2</sub>  | 0.919   | -0.106              | -0.228 | -0.399 | 0.891    | -0.178              | -0.136 | -0.20  |
| S2F2-DP-Cl <sub>2</sub> | 0.866   | -0.199              | -0.001 | 0.005  | 0.888    | -0.177              | -0.066 | -0.275 |
| S2F2-DP-Br <sub>2</sub> | 0.860   | -0.200              | 0.009  | 0.012  | 0.889    | -0.177              | 0.004  | -0.309 |

<sup>a</sup>This value is the average of atomic charges of three carbon atoms connected to the doped sulfur

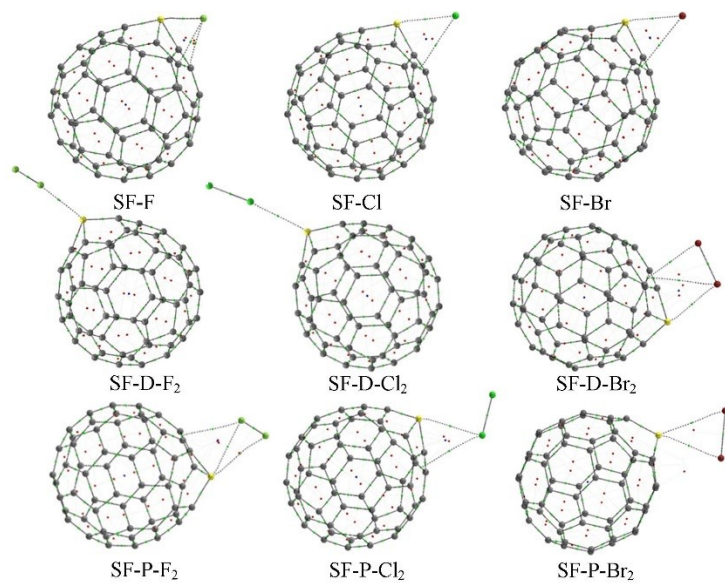

**Figure S1.** BCPs (green dots) and RCPs (red dots) of noncovalent interactions of SF model with halogens and halides

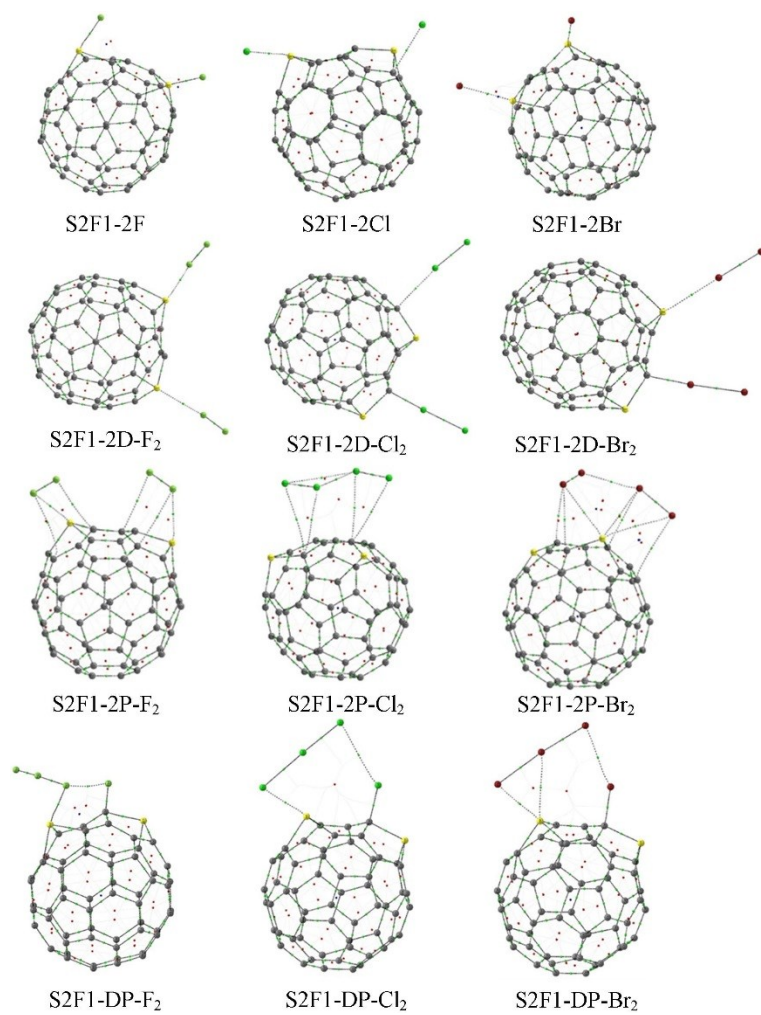

**Figure S2.** BCPs (green dots) and RCPs (red dots) of noncovalent interactions of S2F1 model with halogens and halides

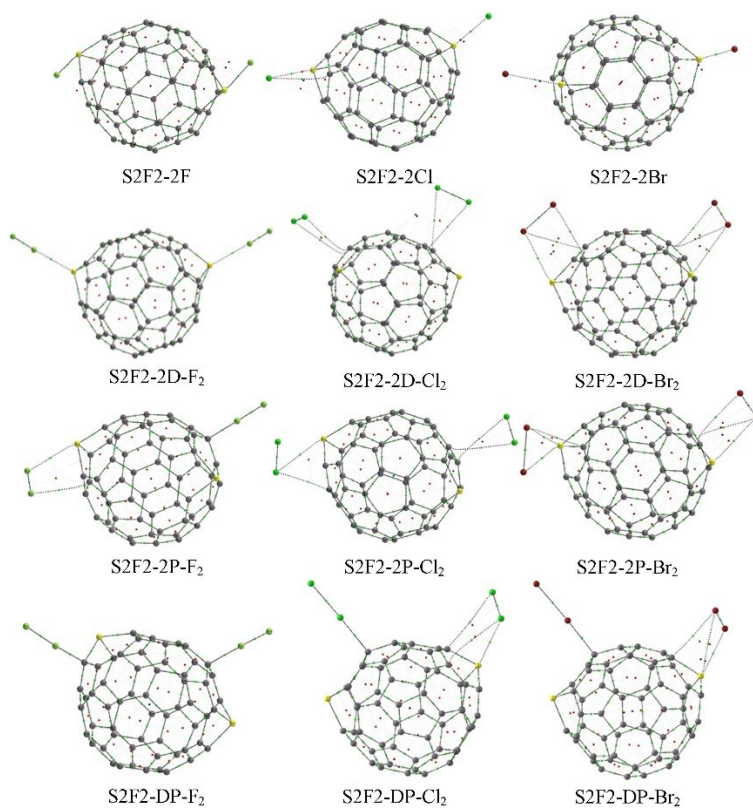

**Figure S3.** BCPs (green dots) and RCPs (red dots) of noncovalent interactions of S2F2 model with halogens and halides

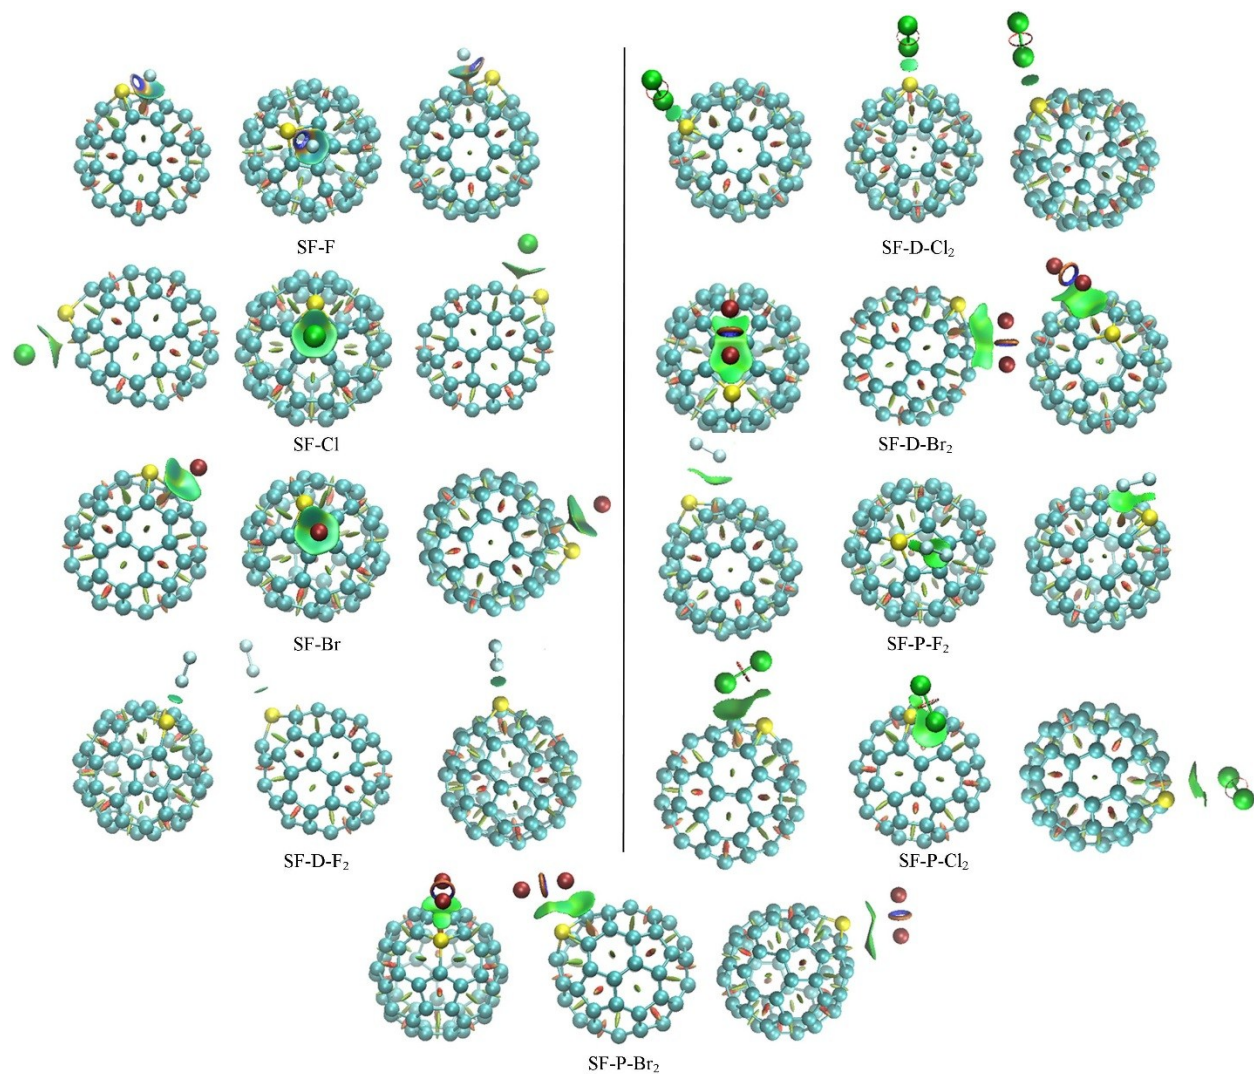

**Figure S4.** Noncovalent interaction isosurfaces obtained from RDG and electron density frames for SF complexes

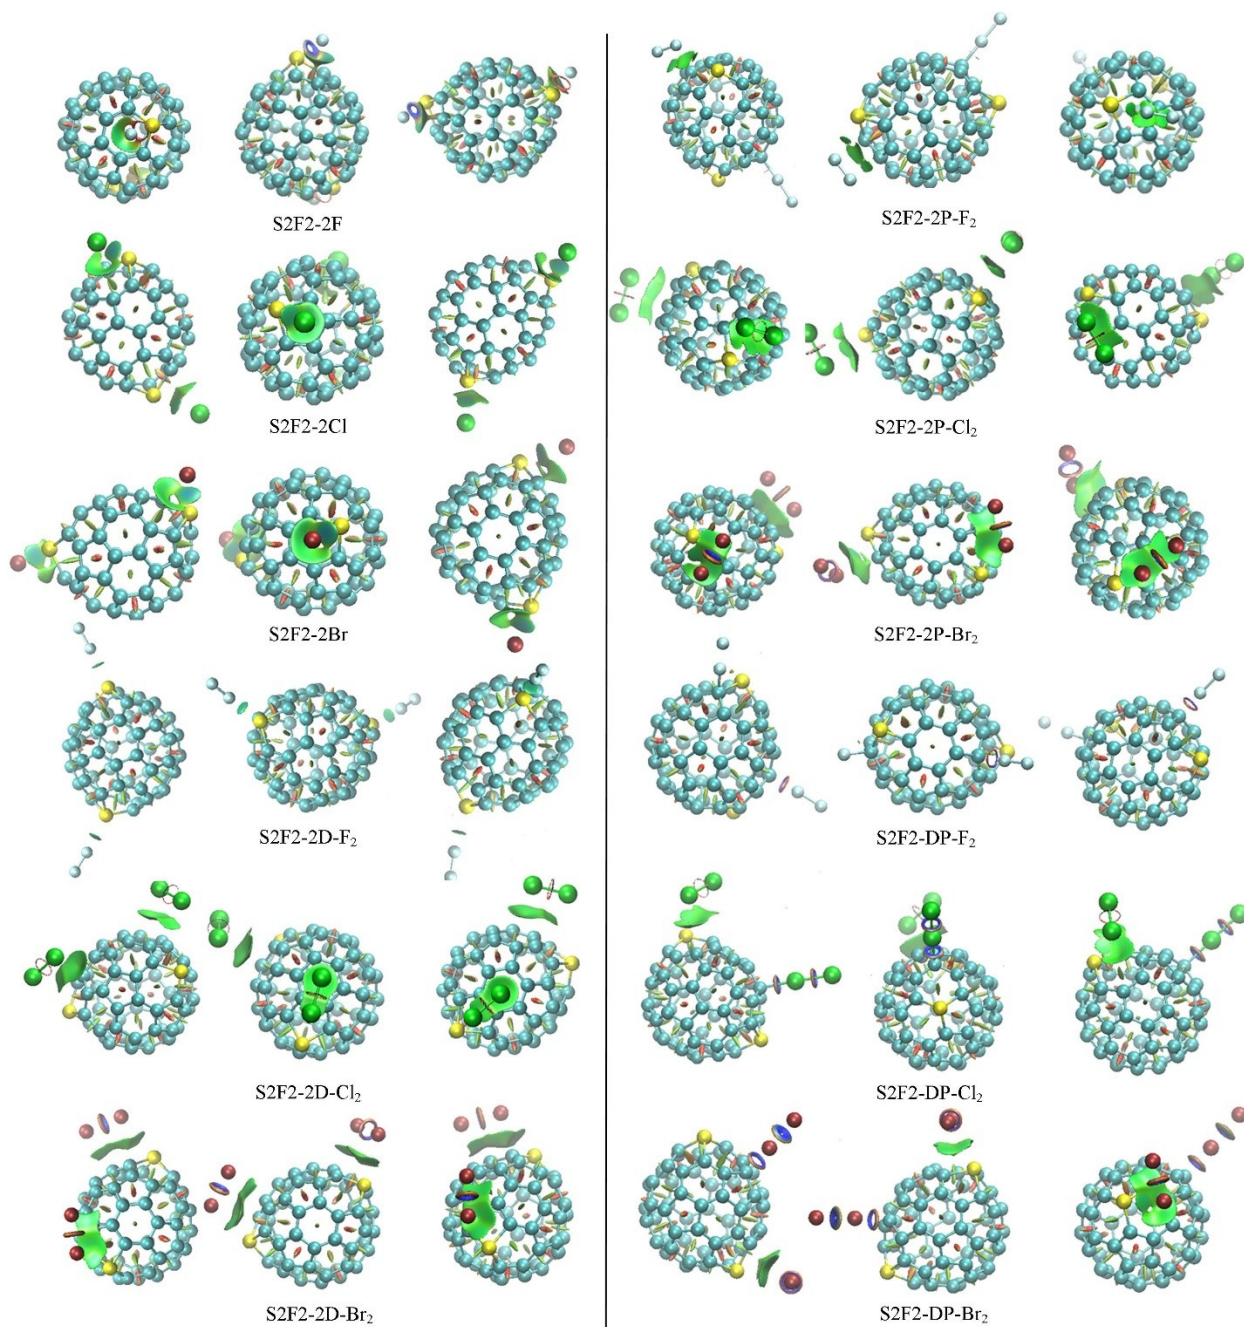

**Figure S5.** Noncovalent interaction isosurfaces obtained from RDG and electron density frames for interactions of S2F2 model with halogens and halides
